# Supplementary material
Source: Springer Nature journal article supplement (https://www.springermedizin.de/resource/supplementary/12936_2012_2150_MOESM3_ESM.pdf/9542770)

## PP population

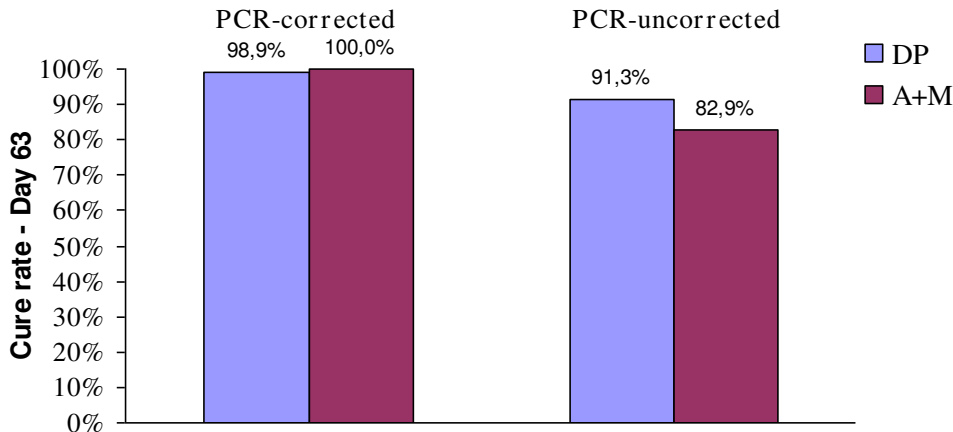

## ITT population

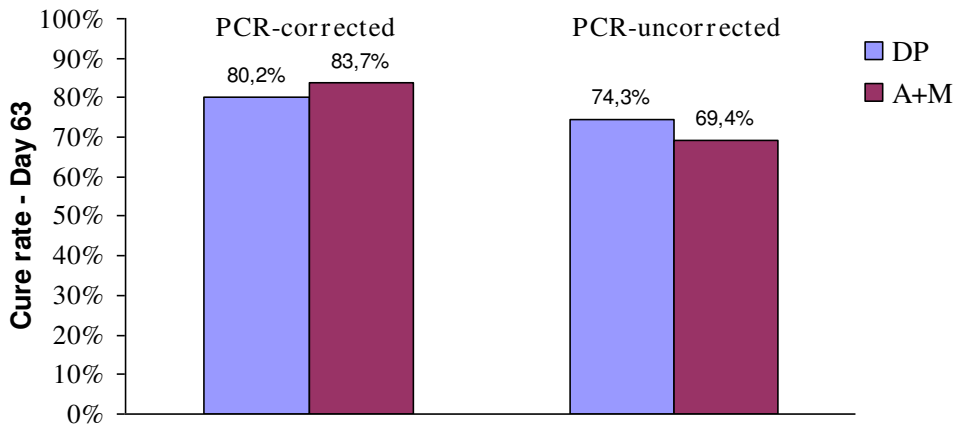

Supplement: MOESM3 [file 9542770]
